# Supplementary material
Source: publisher figshare collection journal article supplement (https://acs.figshare.com/ndownloader/files/5166910)

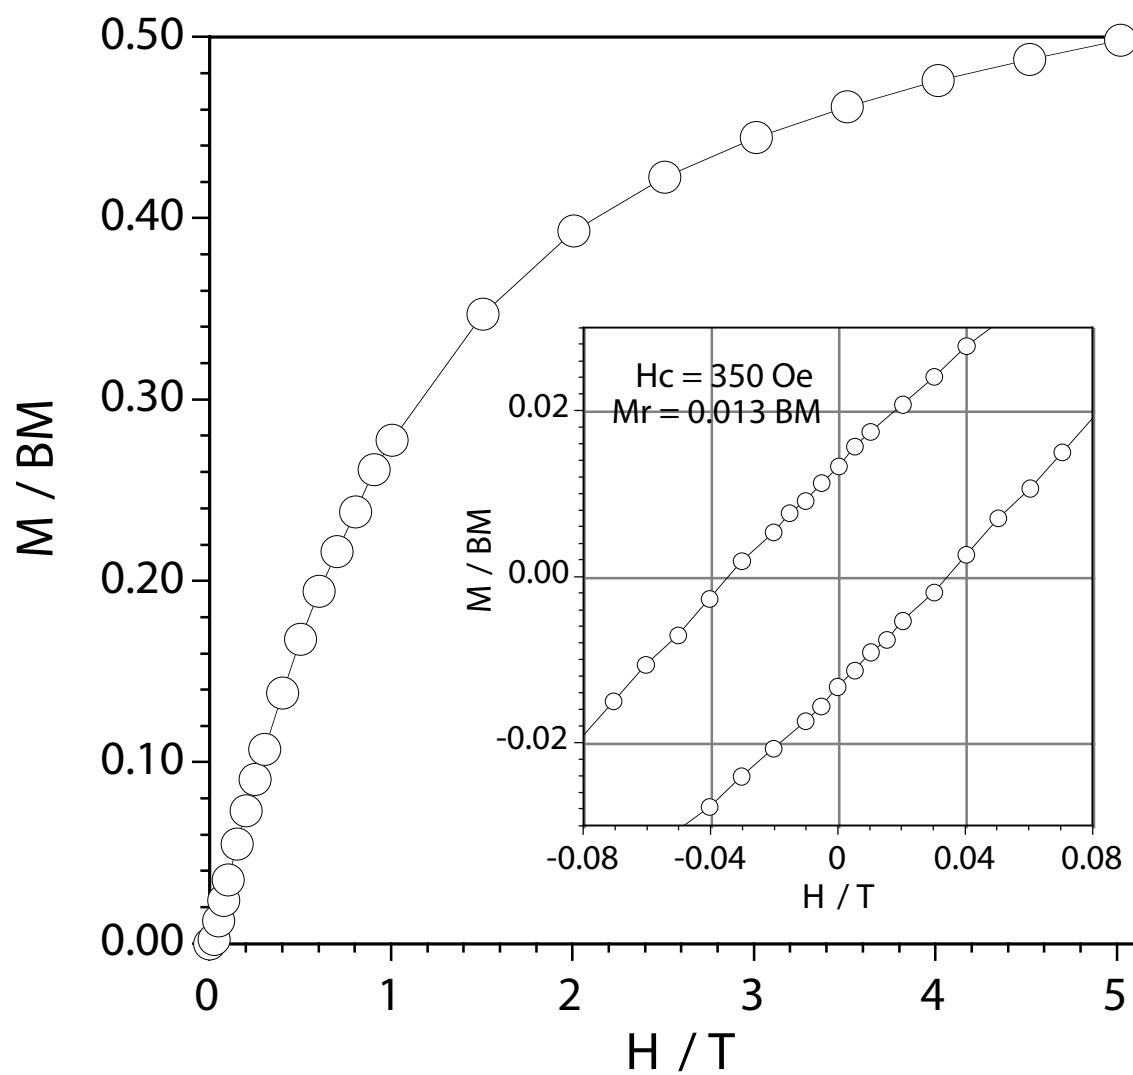

**Figure S3.** Magnetisation versus  $H$  plot at 2 K for compound **3**.

Supplement: Supplementary file 1 [file 5166910]
